# Supplementary material for: Olfactory Learning Supports an Adaptive Sugar-Aversion Gustatory Phenotype in the German Cockroach
Source: MDPI journal article supplement (doi:10.3390/insects12080724), 2021-08-13
Supplement: s1 [file s1]

**Table S1. Responses to solvents and innate odor preferences for single compounds**

% responding was calculated by the formula: % responding = # of insects making choice / total # of tested insects. % responding among treatments and the numbers of insects attracted to odors from Lure 1 and Lure 2 were tested by Chi-square test ( $\alpha = 0.05$ ) with Bonferroni corrections. Different letters indicate significant differences Bonferroni corrections ( $\alpha = 0.05/\#$  of comparisons).

| Solvent vs Solvent (% responding)                              |           |              |              |                             |
|----------------------------------------------------------------|-----------|--------------|--------------|-----------------------------|
| Solvent vs Solvent (100 $\mu$ l/lure)                          |           | WT (n)       | GA (n)       |                             |
| Water vs Water                                                 |           | 10.0 (20)    | 10.0 (20)    | -                           |
| Mineral oil vs Mineral oil                                     |           | 10.0 (20)    | 10.0 (20)    | -                           |
| Ethanol vs Ethanol                                             |           | 10.0 (20)    | 10.0 (20)    | -                           |
| Odor vs Solvent (% responding)                                 |           |              |              |                             |
| Odor ( $\mu$ g/solvent/lure) vs Solvent (100 $\mu$ l/lure)     |           | WT (n)       | GA (n)       | Chi-square test, Bonferroni |
| Beta-caryophyllene<br>Solvent: Mineral oil                     | $10^{-4}$ | 20.0 (30) c  | 33.3 (30) c  | $X^2(11) = 99.5, p < 0.01$  |
|                                                                | $10^{-3}$ | 33.3 (30) c  | 33.3 (30) c  |                             |
|                                                                | 0.01      | 50.0 (30) b  | 43.3 (30) b  |                             |
|                                                                | 0.1       | 63.3 (30) b  | 60.0 (30) b  |                             |
|                                                                | 1         | 80.0 (30) a  | 80.0 (30) a  |                             |
|                                                                | 10        | 100.0 (30) a | 100.0 (30) a |                             |
| Farnesene<br>Solvent: Mineral oil                              | $10^{-4}$ | 20.0 (30) c  | 20.0 (30) c  | $X^2(11) = 79.6, p < 0.01$  |
|                                                                | $10^{-3}$ | 40.0 (30) b  | 36.0 (30) b  |                             |
|                                                                | 0.01      | 46.7 (30) b  | 46.7 (30) b  |                             |
|                                                                | 0.1       | 50.0 (30) b  | 53.3 (30) b  |                             |
|                                                                | 1         | 66.7 (30) b  | 66.7 (30) b  |                             |
|                                                                | 10        | 96.7 (30) a  | 93.3 (30) a  |                             |
| Benzaldehyde<br>Solvent: Mineral oil                           | $10^{-4}$ | 20.0 (20) b  | 13.3 (30) b  | $X^2(5) = 29.0, p < 0.01$   |
|                                                                | $10^{-3}$ | 36.1 (36) b  | 26.7 (30) b  |                             |
|                                                                | 0.01      | 50.0 (40) a  | 33.3 (30) b  |                             |
|                                                                | 0.1       | 45.0 (40) a  | 33.3 (30) b  |                             |
|                                                                | 1         | 23.0 (61) b  | 20.0 (30) b  |                             |
|                                                                | 10        | 16.2 (37) b  | 13.3 (30) b  |                             |
| 3-Methyl-1,2-cyclopentanedione<br>Solvent: Mineral oil         | $10^{-4}$ | 33.3 (30) c  | 33.3 (30) c  | $X^2(11) = 53.0, p < 0.01$  |
|                                                                | $10^{-3}$ | 50.0 (30) b  | 43.3 (30) c  |                             |
|                                                                | 0.01      | 56.7 (30) b  | 56.7 (30) b  |                             |
|                                                                | 0.1       | 60.0 (30) b  | 53.3 (30) b  |                             |
|                                                                | 1         | 83.3 (30) a  | 80.0 (30) a  |                             |
|                                                                | 10        | 86.7 (30) a  | 86.7 (30) a  |                             |
| 4-Hydroxy-3-methoxybenzaldehyde (Vanillin)<br>Solvent: Ethanol | $10^{-4}$ | 26.7 (30) c  | 33.3 (30) c  | $X^2(11) = 140.5, p < 0.01$ |
|                                                                | $10^{-3}$ | 56.7 (30) c  | 56.7 (30) c  |                             |
|                                                                | 0.01      | 70.0 (30) b  | 66.7 (30) b  |                             |
|                                                                | 0.1       | 100.0 (30) a | 100.0 (30) a |                             |
|                                                                | 1         | 100.0 (30) a | 100.0 (30) a |                             |
|                                                                | 10        | 100.0 (30) a | 100.0 (30) a |                             |

|                                                      |                  |             |             |                            |
|------------------------------------------------------|------------------|-------------|-------------|----------------------------|
| 4,5-Dimethyl-2-ethylthiazole<br>Solvent: Mineral oil | 10 <sup>-8</sup> | 30.0 (30)   | 33.3 (30)   | ns                         |
|                                                      | 10 <sup>-7</sup> | 36.7 (30)   | 36.7 (30)   |                            |
|                                                      | 10 <sup>-6</sup> | 43.3 (30)   | 46.7 (30)   |                            |
|                                                      | 10 <sup>-5</sup> | 56.7 (30)   | 60.0 (30)   |                            |
|                                                      | 10 <sup>-4</sup> | 53.3 (30)   | 53.3 (30)   |                            |
|                                                      | 10 <sup>-3</sup> | 53.3 (30)   | 53.3 (30)   |                            |
| 2,4,5-Trimethylthiazole<br>Solvent: Mineral oil      | 10 <sup>-6</sup> | 40.0 (30) c | 30.0 (30) c | $X^2(11) = 39.8, p < 0.01$ |
|                                                      | 10 <sup>-5</sup> | 43.3 (30) b | 40.0 (30) b |                            |
|                                                      | 10 <sup>-4</sup> | 50.0 (30) b | 50.0 (30) b |                            |
|                                                      | 10 <sup>-3</sup> | 73.3 (30) b | 73.3 (30) b |                            |
|                                                      | 0.01             | 73.3 (30) b | 76.7 (30) a |                            |
|                                                      | 0.1              | 73.3 (30) b | 76.7 (30) a |                            |

| Solvent vs Solvent (# of insects making a choice)  |                  |      |         |                                |      |         |
|----------------------------------------------------|------------------|------|---------|--------------------------------|------|---------|
| Solvent vs Solvent (100 µl/lure)                   |                  | WT   |         |                                | GA   |         |
|                                                    |                  | Left | Right   |                                | Left | Right   |
| Water vs Water                                     |                  | 1    | 1       | -                              | 1    | 1       |
| Mineral oil vs Mineral oil                         |                  | 1    | 1       | -                              | 1    | 1       |
| Ethanol vs Ethanol                                 |                  | 1    | 1       | -                              | 1    | 1       |
| Odor vs Solvent (# of insects making a choice)     |                  |      |         |                                |      |         |
| Odor (µg/solvent/lure)<br>vs Solvent (100 µl/lure) |                  | WT   |         |                                | GA   |         |
|                                                    |                  | Odor | Solvent | Chi-square test,<br>Bonferroni | Odor | Solvent |
| Beta-caryophyllene<br>Solvent: Mineral oil         | 10 <sup>-4</sup> | 3    | 3       | ns                             | 5    | 5       |
|                                                    | 10 <sup>-3</sup> | 5    | 5       |                                | 5    | 5       |
|                                                    | 0.01             | 8    | 7       |                                | 7    | 6       |
|                                                    | 0.1              | 12   | 7       |                                | 12   | 6       |
|                                                    | 1                | 17*  | 7       |                                | 17   | 7       |
|                                                    | 10               | 21*  | 9       |                                | 22   | 8       |
| Farnesene<br>Solvent: Mineral oil                  | 10 <sup>-4</sup> | 3    | 3       | ns                             | 3    | 3       |
|                                                    | 10 <sup>-3</sup> | 7    | 5       |                                | 6    | 5       |
|                                                    | 0.01             | 8    | 6       |                                | 8    | 6       |
|                                                    | 0.1              | 9    | 6       |                                | 10   | 6       |
|                                                    | 1                | 13   | 7       |                                | 13   | 7       |
|                                                    | 10               | 19   | 10      |                                | 18   | 10      |
| Benzaldehyde<br>Solvent: Mineral oil               | 10 <sup>-4</sup> | 3    | 3       | ns                             | 2    | 2       |
|                                                    | 10 <sup>-3</sup> | 6    | 7       |                                | 4    | 4       |
|                                                    | 0.01             | 12   | 8       |                                | 6    | 4       |
|                                                    | 0.1              | 11   | 7       |                                | 6    | 4       |
|                                                    | 1                | 7    | 7       |                                | 3    | 3       |
|                                                    | 10               | 3    | 3       |                                | 2    | 2       |

|                                                                   |                  |     |    |    |     |    |    |
|-------------------------------------------------------------------|------------------|-----|----|----|-----|----|----|
| 3-Methyl-1,2-cyclopentanedione<br>Solvent: Mineral oil            | 10 <sup>-4</sup> | 5   | 5  | ns | 5   | 5  | ns |
|                                                                   | 10 <sup>-3</sup> | 8   | 7  |    | 7   | 6  |    |
|                                                                   | 0.01             | 10  | 7  |    | 10  | 7  |    |
|                                                                   | 0.1              | 11  | 7  |    | 10  | 6  |    |
|                                                                   | 1                | 17  | 8  |    | 17* | 7  |    |
|                                                                   | 10               | 20* | 6  |    | 20* | 6  |    |
| 4-Hydroxy-3-methoxybenzaldehyde<br>(Vanillin)<br>Solvent: Ethanol | 10 <sup>-4</sup> | 4   | 4  | ns | 5   | 5  | ns |
|                                                                   | 10 <sup>-3</sup> | 10  | 7  |    | 10  | 7  |    |
|                                                                   | 0.01             | 14  | 7  |    | 14  | 6  |    |
|                                                                   | 0.1              | 22* | 8  |    | 22* | 8  |    |
|                                                                   | 1                | 24* | 6  |    | 24* | 6  |    |
|                                                                   | 10               | 24* | 6  |    | 24* | 6  |    |
| 4,5-Dimethyl-2-ethylthiazole<br>Solvent: Mineral oil              | 10 <sup>-8</sup> | 4   | 5  | ns | 4   | 5  | ns |
|                                                                   | 10 <sup>-7</sup> | 6   | 5  |    | 6   | 5  |    |
|                                                                   | 10 <sup>-6</sup> | 9   | 4  |    | 9   | 5  |    |
|                                                                   | 10 <sup>-5</sup> | 13* | 4  |    | 14* | 4  |    |
|                                                                   | 10 <sup>-4</sup> | 12* | 4  |    | 12* | 4  |    |
|                                                                   | 10 <sup>-3</sup> | 12* | 4  |    | 12* | 4  |    |
| 2,4,5-Trimethylthiazole<br>Solvent: Mineral oil                   | 10 <sup>-6</sup> | 5   | 5  | ns | 5   | 5  | ns |
|                                                                   | 10 <sup>-5</sup> | 7   | 6  |    | 9   | 7  |    |
|                                                                   | 10 <sup>-4</sup> | 9   | 6  |    | 10  | 5  |    |
|                                                                   | 10 <sup>-3</sup> | 14  | 8  |    | 14  | 8  |    |
|                                                                   | 0.01             | 13  | 9  |    | 14  | 9  |    |
|                                                                   | 0.1              | 12  | 10 |    | 12  | 11 |    |

Asterisks indicate significant difference between Vanilla and Chocolate in each Treatment (Chi square test,  $\alpha = 0.05$ ).

**Table S2. Innate odor preferences for multiple compound blends**

% responding was calculated by the formula: % responding = # of insects making choice / total # of tested insects. % responding among treatments and the numbers of insects attracted to odors from Lure 1 and Lure 2 were tested by Chi-square test ( $\alpha = 0.05$ ) with Bonferroni corrections. Different letters indicate significant differences Bonferroni corrections ( $\alpha = 0.05/\#$  of comparisons).

| Odor vs Water (% responding) |                      |           |           |                             |  |  |
|------------------------------|----------------------|-----------|-----------|-----------------------------|--|--|
| Vanilla vs Water             |                      | WT (n)    | GA (n)    | Chi-square test, Bonferroni |  |  |
| Vanilla                      | 0.01 eq <sup>1</sup> | 86.7 (30) | 86.7 (30) | ns                          |  |  |
|                              | 0.1 eq               | 90.0 (30) | 90.0 (30) |                             |  |  |
|                              | 1 eq                 | 86.7 (30) | 90.0 (30) |                             |  |  |
| Chocolate vs Water           |                      | WT (n)    | GA (n)    | Chi-square test, Bonferroni |  |  |
| Chocolate                    | 0.01 eq              | 83.3 (30) | 86.7 (30) | ns                          |  |  |
|                              | 0.1 eq               | 90.0 (30) | 86.7 (30) |                             |  |  |
|                              | 1 eq                 | 90.0 (30) | 90.0 (30) |                             |  |  |

  

| Odor vs Water (# of insects making a choice) |                      |      |       |                             |      |       |
|----------------------------------------------|----------------------|------|-------|-----------------------------|------|-------|
| Vanilla vs Water                             |                      | WT   |       |                             | GA   |       |
|                                              |                      | Odor | Water | Chi-square test, Bonferroni | Odor | Water |
| Vanilla                                      | 0.01 eq <sup>1</sup> | 19*  | 7     | ns                          | 19*  | 7     |
|                                              | 0.1 eq               | 23*  | 4     |                             | 24*  | 3     |
|                                              | 1 eq                 | 26*  | 0     |                             | 26*  | 1     |
| Chocolate vs Water                           |                      | Odor | Water | Chi-square test, Bonferroni | Odor | Water |
| Chocolate                                    | 0.01 eq              | 20*  | 5     | ns                          | 19*  | 7     |
|                                              | 0.1 eq               | 23*  | 4     |                             | 22*  | 4     |
|                                              | 1 eq                 | 27*  | 0     |                             | 27*  | 0     |

  

| Vanilla vs Chocolate (1 eq <sup>1</sup> ) |                  |                                 |         |                                         |
|-------------------------------------------|------------------|---------------------------------|---------|-----------------------------------------|
| Cockroach strains                         | % responding (n) | # of insects that made a choice |         | Chi-square test<br>Chocolate vs Vanilla |
|                                           |                  | Chocolate                       | Vanilla |                                         |
| WT                                        | 90.0 (40)        | 26*                             | 10      | $X^2(1) = 7.1, p < 0.01$                |
| GA                                        | 90.0 (40)        | 27*                             | 9       | $X^2(1) = 9.0, p < 0.01$                |
| Chi-square test<br>WT vs GA               | ns               | ns                              |         |                                         |

<sup>1</sup>, Vanilla and Chocolate were used as equivalents of the commercial product extracts, with 1 representing undiluted extracts.

Asterisks indicate significant difference between Vanilla and Chocolate in each Treatment (Chi square test,  $\alpha = 0.05$ ).

**Table S3. Conditioned odor preferences after a single training session to associate an odor with a tastant**

% responding was calculated by the formula: % responding = # of insects making choice / total # of tested insects. % responding among treatments and the numbers of insects attracted to odors from Lure 1 and Lure 2 were tested by Chi-square test ( $\alpha = 0.05$ ) with Bonferroni corrections. Different letters indicate significant differences Bonferroni corrections ( $\alpha = 0.05/\#$  of comparisons).

| Association of an odor with a tastant (% responding)           |            |           |           |                             |
|----------------------------------------------------------------|------------|-----------|-----------|-----------------------------|
| Conditioning<br>(1-session or 3-sessions operant conditioning) |            | WT (n)    | GA (n)    | Chi-square test, Bonferroni |
| Control <sup>1</sup>                                           |            | 90.0 (40) | 90.0 (40) | ns                          |
| Vanilla + Fructose                                             | 1-session  | 95.0 (40) | 90.0 (40) |                             |
|                                                                | 3-sessions | 95.0 (40) | 92.5 (40) |                             |
| Control <sup>1</sup>                                           |            | 90.0 (40) | 90.0 (40) | ns                          |
| Chocolate + Fructose                                           | 1-session  | 95.0 (40) | 92.5 (40) |                             |
|                                                                | 3-sessions | 85.0 (40) | 95.0 (40) |                             |
| Control <sup>1</sup>                                           |            | 90.0 (40) | 90.0 (40) | ns                          |
| Vanilla + Caffeine                                             | 1-session  | 80.0 (40) | 82.5 (40) |                             |
|                                                                | 3-sessions | 87.5 (40) | 92.5 (40) |                             |
| Control <sup>1</sup>                                           |            | 90.0 (40) | 90.0 (40) | ns                          |
| Chocolate + Caffeine                                           | 1-session  | 82.5 (40) | 92.5 (40) |                             |
|                                                                | 3-sessions | 85.0 (40) | 85.0 (40) |                             |
| Control <sup>1</sup>                                           |            | 90.0 (40) | 90.0 (40) | ns                          |
| Vanilla + Glucose                                              | 1-session  | 90.0 (40) | 85.0 (40) |                             |
|                                                                | 3-sessions | 85.0 (40) | 85.0 (40) |                             |
| Control <sup>1</sup>                                           |            | 90.0 (40) | 90.0 (40) | ns                          |
| Chocolate + Glucose                                            | 1-session  | 90.0 (40) | 82.5 (40) |                             |
|                                                                | 3-sessions | 87.5 (40) | 80.0 (40) |                             |

<sup>1</sup>, Control was obtained from Table S2 vanilla and chocolate.

| Association of an odor with a tastant (# of insects making a choice) |            |                                            |         |                             |                                            |         |                             |
|----------------------------------------------------------------------|------------|--------------------------------------------|---------|-----------------------------|--------------------------------------------|---------|-----------------------------|
| Conditioning<br>(1-session or 3-sessions of self training)           |            | WT                                         |         |                             | GA                                         |         |                             |
|                                                                      |            | Chocolate                                  | Vanilla | Chi-square test, Bonferroni | Chocolate                                  | Vanilla | Chi-square test, Bonferroni |
| Control <sup>1</sup>                                                 |            | 26*                                        | 10      | a                           | 27*                                        | 9       | a                           |
| Vanilla + Fructose                                                   | 1-session  | 15                                         | 23      | b                           | 16                                         | 20      | b                           |
|                                                                      | 3-sessions | 12                                         | 26*     | c                           | 17                                         | 20      | b                           |
|                                                                      |            | X <sup>2</sup> (2) = 13.7, <i>p</i> < 0.01 |         |                             | X <sup>2</sup> (2) = 8.7, <i>p</i> = 0.01  |         |                             |
| Control <sup>1</sup>                                                 |            | 26*                                        | 10      | a                           | 27*                                        | 9       | a                           |
| Chocolate + Fructose                                                 | 1-session  | 35*                                        | 3       | b                           | 34*                                        | 3       | b                           |
|                                                                      | 3-sessions | 32*                                        | 2       | b                           | 36*                                        | 2       | b                           |
|                                                                      |            | X <sup>2</sup> (2) = 8.8, <i>p</i> = 0.01  |         |                             | X <sup>2</sup> (2) = 7.6, <i>p</i> = 0.02  |         |                             |
| Control <sup>1</sup>                                                 |            | 26*                                        | 10      | a                           | 27*                                        | 9       | a                           |
| Vanilla + Caffeine                                                   | 1-session  | 24*                                        | 8       | a                           | 26*                                        | 7       | a                           |
|                                                                      | 3-sessions | 33*                                        | 2       | b                           | 36*                                        | 1       | b                           |
|                                                                      |            | X <sup>2</sup> (2) = 6.4, <i>p</i> = 0.03  |         |                             | X <sup>2</sup> (2) = 7.7, <i>p</i> = 0.02  |         |                             |
| Control <sup>1</sup>                                                 |            | 26*                                        | 10      | a                           | 27*                                        | 9       | a                           |
| Chocolate + Caffeine                                                 | 1-session  | 25*                                        | 8       | a                           | 25                                         | 12      | b                           |
|                                                                      | 3-sessions | 13                                         | 21      | b                           | 14                                         | 20      | c                           |
|                                                                      |            | X <sup>2</sup> (2) = 12.4, <i>p</i> < 0.01 |         |                             | X <sup>2</sup> (2) = 9.3, <i>p</i> < 0.01  |         |                             |
| Control <sup>1</sup>                                                 |            | 26*                                        | 10      | a                           | 27*                                        | 9       | a                           |
| Vanilla + Glucose                                                    | 1-session  | 16                                         | 20      | b                           | 27*                                        | 7       | a                           |
|                                                                      | 3-sessions | 15                                         | 19      | b                           | 33*                                        | 1       | b                           |
|                                                                      |            | X <sup>2</sup> (2) = 7.5, <i>p</i> = 0.02  |         |                             | X <sup>2</sup> (2) = 6.9, <i>p</i> < 0.05  |         |                             |
| Control <sup>1</sup>                                                 |            | 26*                                        | 10      | a                           | 27*                                        | 9       | a                           |
| Chocolate + Glucose                                                  | 1-session  | 34*                                        | 2       | b                           | 24*                                        | 9       | a                           |
|                                                                      | 3-sessions | 33*                                        | 2       | b                           | 13                                         | 19      | b                           |
|                                                                      |            | X <sup>2</sup> (2) = 10.3, <i>p</i> < 0.01 |         |                             | X <sup>2</sup> (2) = 10.5, <i>p</i> < 0.01 |         |                             |

<sup>1</sup>, Control was obtained from Table S2 vanilla and chocolate.

Asterisks indicate significant difference between Vanilla and Chocolate in each Treatment (Chi square test,  $\alpha = 0.05$ ).

**Table S4. Conditioned odor preferences after training to associate two odors with different tastants**

% responding was calculated by the formula: % responding = # of insects making choice / total # of tested insects. % responding among treatments and the numbers of insects attracted to odors from Lure 1 and Lure 2 were tested by Chi-square test ( $\alpha = 0.05$ ) with Bonferroni corrections. Different letters indicate significant differences Bonferroni corrections ( $\alpha = 0.05/\#$  of comparisons).

| Association of two odors with different tastants (% responding) |            |            |            |                             |
|-----------------------------------------------------------------|------------|------------|------------|-----------------------------|
| Conditioning<br>(1-session or 3-sessions of self training)      |            | WT (n)     | GA (n)     | Chi-square test, Bonferroni |
| Control <sup>1</sup>                                            |            | 90.0 (40)  | 90.0 (40)  | ns                          |
| Vanilla + Fructose                                              | 1-session  | 93.8 (80)  | 84.0 (50)  |                             |
| Chocolate + Caffeine                                            | 3-sessions | 90.0 (50)  | 87.5 (40)  |                             |
| Control <sup>1</sup>                                            |            | 90.0 (40)  | 90.0 (40)  | ns                          |
| Vanilla + Caffeine                                              | 1-session  | 93.3 (105) | 94.0 (50)  |                             |
| Chocolate + Fructose                                            | 3-sessions | 81.3 (80)  | 96.0 (50)  |                             |
| Control <sup>1</sup>                                            |            | 90.0 (40)  | 90.0 (40)  | ns                          |
| Vanilla + Fructose                                              | 1-session  | 88.7 (62)  | 87.5 (40)  |                             |
| Chocolate + Glucose                                             | 3-sessions | 84.0 (50)  | 88.6 (70)  |                             |
| Control <sup>1</sup>                                            |            | 90.0 (40)  | 90.0 (40)  | ns                          |
| Vanilla + Glucose                                               | 1-session  | 85.0 (60)  | 96.4 (55)  |                             |
| Chocolate + Fructose                                            | 3-sessions | 85.0 (60)  | 92.3 (65)  |                             |
| Control <sup>1</sup>                                            |            | 90.0 (40)a | 90.0 (40)a | $X^2(5) = 64.1, p < 0.01$   |
| Vanilla + Glucose                                               | 1-session  | 83.3 (60)a | 57.1 (70)b |                             |
| Chocolate + Caffeine                                            | 3-sessions | 87.7 (57)a | 42.5 (80)b |                             |
| Control <sup>1</sup>                                            |            | 90.0 (40)a | 90.0 (40)a | $X^2(1) = 163.7, p < 0.01$  |
| Vanilla + Caffeine                                              | 1-session  | 92.9 (70)a | 65.7 (70)b |                             |
| Chocolate + Glucose                                             | 3-sessions | 92.5 (80)a | 37.1 (70)b |                             |

<sup>1</sup>, Control was obtained from Table S2 vanilla and chocolate.



| Association of two odors with different tastants<br>(# of insects making a choice) |            |                                            |         |                                |                                            |         |                                |
|------------------------------------------------------------------------------------|------------|--------------------------------------------|---------|--------------------------------|--------------------------------------------|---------|--------------------------------|
| Conditioning<br>(1-session or 3-sessions of self<br>training)                      |            | WT                                         |         |                                | GA                                         |         |                                |
|                                                                                    |            | Chocolate                                  | Vanilla | Chi-square test,<br>Bonferroni | Chocolate                                  | Vanilla | Chi-square test,<br>Bonferroni |
| Control <sup>1</sup>                                                               |            | 26*                                        | 10      | a                              | 27*                                        | 9       | a                              |
| Vanilla + Fructose                                                                 | 1-session  | 35                                         | 40      | b                              | 21                                         | 21      | b                              |
| Chocolate + Caffeine                                                               | 3-sessions | 8                                          | 37*     | c                              | 8                                          | 27*     | c                              |
|                                                                                    |            | X <sup>2</sup> (2) = 24.4, <i>p</i> < 0.01 |         |                                | X <sup>2</sup> (2) = 19.3, <i>p</i> < 0.01 |         |                                |
| Control <sup>1</sup>                                                               |            | 26*                                        | 10      | a                              | 27*                                        | 9       | a                              |
| Vanilla + Caffeine                                                                 | 1-session  | 82*                                        | 16      | b                              | 42*                                        | 5       | b                              |
| Chocolate + Fructose                                                               | 3-sessions | 60*                                        | 5       | c                              | 45*                                        | 3       | b                              |
|                                                                                    |            | X <sup>2</sup> (2) = 7.2, <i>p</i> = 0.03  |         |                                | X <sup>2</sup> (2) = 6.8, <i>p</i> = 0.03  |         |                                |
| Control <sup>1</sup>                                                               |            | 26*                                        | 10      | -                              | 27*                                        | 9       | a                              |
| Vanilla + Fructose                                                                 | 1-session  | 31                                         | 24      | -                              | 18                                         | 17      | b                              |
| Chocolate + Glucose                                                                | 3-sessions | 22                                         | 20      | -                              | 15                                         | 47*     | c                              |
|                                                                                    |            | ns                                         |         |                                | X <sup>2</sup> (2) = 24.5, <i>p</i> < 0.01 |         |                                |
| Control <sup>1</sup>                                                               |            | 26*                                        | 10      | -                              | 27*                                        | 9       | a                              |
| Vanilla + Glucose                                                                  | 1-session  | 25                                         | 26      | -                              | 47*                                        | 6       | b                              |
| Chocolate + Fructose                                                               | 3-sessions | 25                                         | 26      | -                              | 58*                                        | 2       | c                              |
|                                                                                    |            | ns                                         |         |                                | X <sup>2</sup> (2) = 10.5, <i>p</i> < 0.01 |         |                                |
| Control <sup>1</sup>                                                               |            | 26*                                        | 10      | a                              | 27*                                        | 9       | -                              |
| Vanilla + Glucose                                                                  | 1-session  | 23                                         | 27      | b                              | 29*                                        | 11      | -                              |
| Chocolate + Caffeine                                                               | 3-sessions | 11                                         | 39*     | c                              | 25*                                        | 9       | -                              |
|                                                                                    |            | X <sup>2</sup> (2) = 21.5, <i>p</i> < 0.01 |         |                                | ns                                         |         |                                |
| Control <sup>1</sup>                                                               |            | 26*                                        | 10      | a                              | 27*                                        | 9       | -                              |
| Vanilla + Caffeine                                                                 | 1-session  | 57*                                        | 8       | b                              | 34*                                        | 12      | -                              |
| Chocolate + Glucose                                                                | 3-sessions | 69*                                        | 5       | c                              | 19*                                        | 7       | -                              |
|                                                                                    |            | X <sup>2</sup> (2) = 9.4, <i>p</i> < 0.01  |         |                                | ns                                         |         |                                |

<sup>1</sup>, Control was obtained from Table S2 vanilla and chocolate.

Asterisks indicate significant difference between Vanilla and Chocolate in each Treatment (Chi square test,  $\alpha = 0.05$ ).

**Table S5. Retention of olfactory memory**

% responding was calculated by the formula: % responding = # of insects making choice / total # of tested insects. % responding among treatments and the numbers of insects attracted to odors from Lure 1 and Lure 2 were tested by Chi-square test ( $\alpha = 0.05$ ) with Bonferroni corrections. Different letters indicate significant differences Bonferroni corrections ( $\alpha = 0.05/\#$  of comparisons).

| Retention of olfactory memory (% responding)   |                        |             |             |                                |
|------------------------------------------------|------------------------|-------------|-------------|--------------------------------|
| Conditioning<br>(3 sessions, self<br>training) | Tested day             | WT (n)      | GA (n)      | Chi-square test,<br>Bonferroni |
| Control <sup>1</sup>                           |                        | 90.0 (40)   | 90.0 (40)   | ns                             |
| Vanilla + Fructose<br>Chocolate + Caffeine     | 1-d later <sup>2</sup> | 90.0 (50)   | 87.5 (40)   |                                |
|                                                | 2-d later              | 92.5 (40)   | 92.5 (40)   |                                |
|                                                | 3-d later              | 92.5 (40)   | 92.5 (40)   |                                |
|                                                | 5-d later              | 92.5 (40)   | 92.5 (40)   |                                |
| Control <sup>1</sup>                           |                        | 90.0 (40)   | 90.0 (40)   | ns                             |
| Vanilla + Fructose<br>Chocolate + Glucose      | 1-d later <sup>2</sup> | 84.0 (50)   | 88.6 (70)   |                                |
|                                                | 2-d later              | 95.0 (40)   | 97.5 (40)   |                                |
|                                                | 3-d later              | 95.0 (40)   | 97.5 (40)   |                                |
|                                                | 5-d later              | 95.0 (40)   | 95.0 (40)   |                                |
| Control <sup>1</sup>                           |                        | 90.0 (40) a | 90.0 (40) a | $X^2(9) = 113.4, p < 0.01$     |
| Vanilla + Glucose<br>Chocolate + Caffeine      | 1-d later <sup>2</sup> | 87.7 (57) a | 42.5 (80) b |                                |
|                                                | 2-d later              | 90.0 (40) a | 42.5 (40) b |                                |
|                                                | 3-d later              | 92.5 (40) a | 70.0 (40) c |                                |
|                                                | 5-d later              | 97.5 (40) a | 90.0 (40) a |                                |

<sup>1</sup>, Control was obtained from Table S2 vanilla and chocolate.

<sup>2</sup>, Conditioned preference 1-d later was obtained from Table S4.

| Retention of olfactory memory (# of insects making a choice) |                        |            |                                            |         |                                |                                            |         |                                |
|--------------------------------------------------------------|------------------------|------------|--------------------------------------------|---------|--------------------------------|--------------------------------------------|---------|--------------------------------|
| Conditioning<br>(3 sessions, self<br>training)               |                        | Tested day | WT                                         |         |                                | GA                                         |         |                                |
|                                                              |                        |            | Chocolate                                  | Vanilla | Chi-square test,<br>Bonferroni | Chocolate                                  | Vanilla | Chi-square test,<br>Bonferroni |
| Control <sup>1</sup>                                         |                        |            | 26*                                        | 10      | a                              | 27*                                        | 9       | a                              |
| Vanilla + Fructose<br>and<br>Chocolate + Caffeine            | 1-d later <sup>2</sup> | 8          | 37*                                        | b       | 8                              | 27*                                        | b       |                                |
|                                                              | 2-d later              | 11         | 26*                                        | b       | 10                             | 27*                                        | b       |                                |
|                                                              | 3-d later              | 15         | 22                                         | c       | 16                             | 21                                         | c       |                                |
|                                                              | 5-d later              | 25*        | 12                                         | a       | 26*                            | 11                                         | a       |                                |
|                                                              |                        |            | X <sup>2</sup> (4) = 35.7, <i>p</i> < 0.01 |         |                                | X <sup>2</sup> (4) = 33.6, <i>p</i> < 0.01 |         |                                |
| Control <sup>1</sup>                                         |                        |            | 26*                                        | 10      | -                              | 27*                                        | 9       | a                              |
| Vanilla + Fructose<br>and<br>Chocolate + Glucose             | 1-d later <sup>2</sup> | 22         | 20                                         | -       | 15                             | 47*                                        | b       |                                |
|                                                              | 2-d later              | 20         | 18                                         | -       | 13                             | 26*                                        | b       |                                |
|                                                              | 3-d later              | 20         | 18                                         | -       | 20                             | 19                                         | c       |                                |
|                                                              | 5-d later              | 22         | 16                                         | -       | 27*                            | 11                                         | a       |                                |
|                                                              |                        |            | ns                                         |         |                                | X <sup>2</sup> (4) = 36.2, <i>p</i> < 0.01 |         |                                |
| Control <sup>1</sup>                                         |                        |            | 26*                                        | 10      | a                              | 27*                                        | 9       | -                              |
| Vanilla + Glucose<br>and<br>Chocolate + Caffeine             | 1-d later <sup>2</sup> | 11         | 39*                                        | b       | 25*                            | 9                                          | -       |                                |
|                                                              | 2-d later              | 13         | 23*                                        | c       | 12                             | 5                                          | -       |                                |
|                                                              | 3-d later              | 18         | 19                                         | c       | 21*                            | 7                                          | -       |                                |
|                                                              | 5-d later              | 24         | 15                                         | a       | 26*                            | 10                                         | -       |                                |
|                                                              |                        |            | X <sup>2</sup> (4) = 26.8, <i>p</i> < 0.01 |         |                                | ns                                         |         |                                |

<sup>1</sup>, Control was obtained from Table S2 vanilla and chocolate.

<sup>2</sup>, Conditioned preference 1-d later was obtained from Table S4.

Asterisks indicate significant difference between Vanilla and Chocolate in each Treatment (Chi square test,  $\alpha = 0.05$ ).
